# Supplementary material for: WISDOM Randomized Trial Comparing Risk-Based Versus Annual Breast Cancer Screening: Study Cohort Characteristics and Design
Source: Research Square preprint supplement (doi:10.21203/rs.3.rs-7665355/v2), 2025-12-15
Supplement: Supplementary file 1 [file 7acd326eeccd313fc190423e.pdf]

**SUPPLEMENTARY INFORMATION**

WISDOM Randomized Trial Comparing Risk-Based Versus Annual Breast Cancer Screening:  
Baseline Characteristics and Study Conduct

Fiscalini et al.

**Table of Contents**

Supplementary Table S1: Minority enrolment in WISDOM..... 2

Supplementary Table S2: List of clinical sites ..... 3

Supplementary Table S3: Factors affecting patient participation choices ..... 4

Supplementary Table S4. Risk assessment and screening recommendations..... 5

**Supplementary Table S1: Minority enrolment in WISDOM**

Year-by-year rates of enrolment to WISDOM categorized by self-reported race/ethnicity

|                   | White, NH | Black or<br>African<br>American | Native Hawaiian or Other<br>Pac Islander/American<br>Indian or Alaska Native, NH | Asian, NH | Two or More<br>Race, NH | Hispanic or<br>Latino | Unknown/Pref not<br>to answer/other |
|-------------------|-----------|---------------------------------|----------------------------------------------------------------------------------|-----------|-------------------------|-----------------------|-------------------------------------|
| <b>Start-2019</b> | 81.4%     | 1.7%                            | 0.3%                                                                             | 4.5%      | 2.7%                    | 8.1%                  | 1.2%                                |
| <b>2020</b>       | 74.9%     | 4.1%                            | 0.4%                                                                             | 5.9%      | 3.3%                    | 10.4%                 | 1.0%                                |
| <b>2021</b>       | 73.4%     | 8.1%                            | 0.5%                                                                             | 4.0%      | 3.1%                    | 10.2%                 | 0.7%                                |
| <b>2022</b>       | 67.4%     | 11.5%                           | 0.6%                                                                             | 4.4%      | 3.9%                    | 11.4%                 | 0.7%                                |
| <b>2023</b>       | 59.4%     | 17.5%                           | 0.8%                                                                             | 5.8%      | 3.1%                    | 11.8%                 | 1.5%                                |
| <b>All Time</b>   | 75.6%     | 5.6%                            | 0.4%                                                                             | 4.6%      | 3.1%                    | 9.6%                  | 1.0%                                |

**Supplementary Table S2: List of clinical sites**

List of WISDOM recruitment sites and years of enrolment in WISDOM 1.0

| Site                                   | Year<br>Site Opened |
|----------------------------------------|---------------------|
| <b>Initial sites</b>                   |                     |
| University of California San Francisco | 2016                |
| University of California San Diego     | 2016                |
| University of California Los Angeles   | 2017                |
| University of California Davis         | 2017                |
| University of California Irvine        | 2017                |
| Sanford Health                         | 2017                |
| <b>Expansion sites</b>                 |                     |
| University of Chicago                  | 2019                |
| University of Alabama at Birmingham    | 2020                |
| Diagnostic Center of Miami             | 2020                |
| Louisiana State University             | 2020                |
| Veterans Health Administration*        | 2021                |

\*Recruitment only through select VA centers

**Supplementary Table S3:** Factors affecting patient participation choices

Multivariate Analysis Comparing Participant Choice of Randomized versus Self-Selection into Annual or Personalized. NH = Non-Hispanic

|                                                                                     | Self-Select Risk-based vs<br>Randomized<br>(complete cases) |                      |                       |         | Self-Select Annual vs<br>Randomized<br>(complete cases) |                      |                       |         |
|-------------------------------------------------------------------------------------|-------------------------------------------------------------|----------------------|-----------------------|---------|---------------------------------------------------------|----------------------|-----------------------|---------|
|                                                                                     | RR                                                          | Lower<br>CI:<br>2.5% | Upper<br>CI:<br>97.5% | p*      | RR                                                      | Lower<br>CI:<br>2.5% | Upper<br>CI:<br>97.5% | p*      |
| <b>Age (years) at Group Selected Date</b>                                           |                                                             |                      |                       |         |                                                         |                      |                       |         |
| <50                                                                                 | ref                                                         | ref                  | ref                   | ref     | ref                                                     | ref                  | ref                   | ref     |
| 50-59                                                                               | 0.92                                                        | 0.88                 | 0.96                  | 0.0001  | 1.27                                                    | 1.06                 | 1.51                  | 0.0089  |
| 60-69                                                                               | 0.87                                                        | 0.83                 | 0.92                  | <0.0001 | 1.67                                                    | 1.36                 | 2.05                  | <0.0001 |
| 70-79                                                                               | 0.75                                                        | 0.69                 | 0.82                  | <0.0001 | 2.02                                                    | 1.57                 | 2.60                  | <0.0001 |
| <b>Race, Ethnicity</b>                                                              |                                                             |                      |                       |         |                                                         |                      |                       |         |
| NH White                                                                            | ref                                                         | ref                  | ref                   | ref     | ref                                                     | ref                  | ref                   | ref     |
| Hispanic                                                                            | 1.18                                                        | 1.13                 | 1.23                  | <0.0001 | 1.42                                                    | 1.19                 | 1.70                  | 0.0001  |
| NH Asian                                                                            | 1.20                                                        | 1.13                 | 1.28                  | <0.0001 | 1.33                                                    | 1.02                 | 1.74                  | 0.0383  |
| NH Black or African American                                                        | 1.02                                                        | 0.96                 | 1.09                  | 0.5047  | 1.75                                                    | 1.44                 | 2.12                  | <0.0001 |
| NH More than one race                                                               | 1.16                                                        | 1.08                 | 1.25                  | 0.0001  | 0.76                                                    | 0.51                 | 1.14                  | 0.1847  |
| NH Native Hawaiian or Other<br>Pacific Islander/American<br>Indian or Alaska Native | 0.91                                                        | 0.72                 | 1.15                  | 0.4357  | 0.85                                                    | 0.33                 | 2.22                  | 0.7455  |
| Other/Unknown                                                                       | 1.41                                                        | 1.25                 | 1.58                  | <0.0001 | 1.78                                                    | 1.06                 | 2.99                  | 0.0294  |
| <b>Family History at Baseline</b>                                                   |                                                             |                      |                       |         |                                                         |                      |                       |         |
| No First or Second Degree<br>Relative                                               | ref                                                         | ref                  | ref                   | ref     | ref                                                     | ref                  | ref                   | ref     |
| First Degree Relative                                                               | 1.49                                                        | 1.42                 | 1.55                  | <0.0001 | 0.96                                                    | 0.81                 | 1.14                  | 0.6790  |
| Second Degree Relative                                                              | 1.27                                                        | 1.22                 | 1.31                  | <0.0001 | 1.01                                                    | 0.89                 | 1.16                  | 0.8312  |
| First and Second Degree<br>Relative                                                 | 1.58                                                        | 1.51                 | 1.65                  | <0.0001 | 1.07                                                    | 0.88                 | 1.29                  | 0.4980  |
| Don't Know                                                                          | 1.21                                                        | 1.14                 | 1.28                  | <0.0001 | 0.81                                                    | 0.65                 | 1.00                  | 0.0544  |
| No Response/Missing                                                                 | 1.29                                                        | 1.14                 | 1.45                  | <0.0001 | 0.88                                                    | 0.54                 | 1.46                  | 0.6281  |
| <b>Any Atypia Biopsies<sup>†</sup></b>                                              |                                                             |                      |                       |         |                                                         |                      |                       |         |
| Not Biopsied                                                                        | ref                                                         | ref                  | ref                   | ref     | ref                                                     | ref                  | ref                   | ref     |
| Biopsied - No ADH                                                                   | 1.09                                                        | 1.05                 | 1.13                  | <0.0001 | 1.09                                                    | 0.95                 | 1.24                  | 0.2089  |
| Biopsied - Yes ADH                                                                  | 1.46                                                        | 1.32                 | 1.61                  | <0.0001 | 1.32                                                    | 0.78                 | 2.23                  | 0.2951  |
| Biopsied - Don't know ADH                                                           | 1.38                                                        | 1.25                 | 1.52                  | <0.0001 | 1.14                                                    | 0.70                 | 1.86                  | 0.5969  |
| <b>Hormone Replacement Therapy Use Ever<sup>†</sup></b>                             |                                                             |                      |                       |         |                                                         |                      |                       |         |
| None                                                                                | ref                                                         | ref                  | ref                   | ref     | ref                                                     | ref                  | ref                   | ref     |
| One or More                                                                         | 1.09                                                        | 1.05                 | 1.12                  | <0.0001 | 1.12                                                    | 1.00                 | 1.26                  | 0.0511  |
| <b>Age (years) at Menarche<sup>†</sup></b>                                          |                                                             |                      |                       |         |                                                         |                      |                       |         |
| 12 to 13                                                                            | ref                                                         | ref                  | ref                   | ref     | ref                                                     | ref                  | ref                   | ref     |
| Under age 12                                                                        | 0.96                                                        | 0.93                 | 1.00                  | 0.0524  | 0.84                                                    | 0.73                 | 0.97                  | 0.0174  |
| 14 or above                                                                         | 1.01                                                        | 0.98                 | 1.05                  | 0.4902  | 1.03                                                    | 0.91                 | 1.17                  | 0.6064  |
| <b>Age (years) at first live birth<sup>†</sup></b>                                  |                                                             |                      |                       |         |                                                         |                      |                       |         |
| Nulliparous                                                                         | ref                                                         | ref                  | ref                   | ref     | ref                                                     | ref                  | ref                   | ref     |
| <20 years                                                                           | 0.94                                                        | 0.88                 | 1.00                  | 0.0428  | 0.91                                                    | 0.72                 | 1.15                  | 0.4171  |
| 20-24 years                                                                         | 0.95                                                        | 0.91                 | 1.00                  | 0.0435  | 1.04                                                    | 0.88                 | 1.23                  | 0.6237  |
| 25-29 years                                                                         | 0.98                                                        | 0.94                 | 1.02                  | 0.3736  | 1.00                                                    | 0.86                 | 1.17                  | 0.9686  |
| 30-34 years                                                                         | 1.04                                                        | 0.99                 | 1.08                  | 0.1041  | 1.00                                                    | 0.85                 | 1.19                  | 0.9606  |
| >34 years                                                                           | 1.06                                                        | 1.01                 | 1.11                  | 0.0166  | 0.98                                                    | 0.81                 | 1.19                  | 0.8557  |
| <b>Baseline Area Deprivation Index<sup>†</sup> (ADI)</b>                            |                                                             |                      |                       |         |                                                         |                      |                       |         |
| Least Disadvantaged (1 to 3)                                                        | ref                                                         | ref                  | ref                   | ref     | ref                                                     | ref                  | ref                   | ref     |
| Middle Disadvantaged (4 to 6)                                                       | 1.00                                                        | 0.97                 | 1.04                  | 0.9654  | 0.98                                                    | 0.86                 | 1.11                  | 0.7148  |
| Most Disadvantaged (7 to 10)                                                        | 0.95                                                        | 0.91                 | 0.99                  | 0.0091  | 1.02                                                    | 0.88                 | 1.18                  | 0.7951  |
| Data suppressed/ Not<br>geocoded                                                    | 1.04                                                        | 0.96                 | 1.13                  | 0.3284  | 1.24                                                    | 0.94                 | 1.63                  | 0.1276  |

\* Wald type III

<sup>†</sup> denotes imputed variable

<sup>1</sup> Kind & Buckingham, N. Engl. J. Med. 378, 2456–2458 (2018).

**Supplementary Table S4.** Risk assessment and screening recommendations

| Risk:                  | Highest Risk                                                                                                                                                                                                                                                                                                                                      | Elevated Risk                                                                                                                                                                                                                                                                                                                                                                      | Average Risk                                                                                                                                | Lowest Risk                                                                                                                                                                                                                                                                                                                                                       |
|------------------------|---------------------------------------------------------------------------------------------------------------------------------------------------------------------------------------------------------------------------------------------------------------------------------------------------------------------------------------------------|------------------------------------------------------------------------------------------------------------------------------------------------------------------------------------------------------------------------------------------------------------------------------------------------------------------------------------------------------------------------------------|---------------------------------------------------------------------------------------------------------------------------------------------|-------------------------------------------------------------------------------------------------------------------------------------------------------------------------------------------------------------------------------------------------------------------------------------------------------------------------------------------------------------------|
| Criteria/<br>Threshold | <p>BRCA1/2, TP53, PTEN, STK11, CDH1 mutation carrier</p> <p>OR</p> <p>ATM, PALB2 or CHEK2 mutation carrier with positive family history of breast cancer</p> <p>OR</p> <p>Women with a <math>\geq 6\%</math> 5-year risk (risk of an average BRCA carrier)</p> <p>OR</p> <p>Women with a history of mantle radiation between ages 10-30 years</p> | <p>Women aged 40-49 with extremely dense breasts</p> <p>OR</p> <p>Women at a <math>\geq 1\%</math> 5-year risk of developing ER-breast cancer based on susceptibility SNPs</p> <p>OR</p> <p>Women in top 2.5<sup>th</sup> percentile of risk by 1-year age category</p> <p>OR</p> <p>ATM, PALB2 or CHEK2 mutation carrier without a positive family history** of breast cancer</p> | <p>Women aged 50-74</p> <p>OR</p> <p>Women aged 40-49 with a <math>\geq 1.3\%</math> 5-year risk (risk of an average 50 year-old woman)</p> | <p>Women aged 40-49 with a <math>&lt; 1.3\%</math> 5-year risk of developing breast cancer</p> <p>OR</p> <p>Low risk (5-year risk <math>&lt; 1.3\%</math>) and age <math>\geq 75</math></p> <p>OR</p> <p>Age <math>\geq 70</math>, 5-year risk <math>\leq 2.2\%</math> and co-morbidities with predicted <math>\geq 50\%</math> risk of mortality in 10 years</p> |
| Screening Rec:         | <p>Annual mammogram</p> <p>Adjunct MRI</p> <p>BHS active outreach</p> <p>Risk reduction consultation</p>                                                                                                                                                                                                                                          | <p>Annual mammogram*</p> <p>BHS active outreach</p> <p>Risk reduction consultation</p>                                                                                                                                                                                                                                                                                             | <p>Biennial mammogram†</p>                                                                                                                  | <p>No screening until age 50</p> <p>OR</p> <p>Stop screening</p>                                                                                                                                                                                                                                                                                                  |

\* If individual does not meet criteria for annual mammogram + MRI

† If individual does not meet criteria for annual mammogram or annual mammogram + MRI

\*\* Family history is defined as a first degree relative with breast cancer, two second-degree relatives with breast cancer, or one second-degree relative diagnosed prior to age 45.

(previously published in Esserman et al. *NPJ Breast Cancer*. 2017;3(1):34. doi:10.1038/s41523-017-0035-5)
